# Supplementary material
Source: PubMed Central journal article supplement (PMC2748816)
Supplement: NIHMS112298-supplement-4.pdf [file NIHMS112298-supplement-4.pdf]

## **Supplementary Materials**

**Supplementary table 1:** List of genes significantly affected by stabilized  $\beta$ -Catenin in cardiac progenitors.

**Supplementary table 2:** List of qPCR primers and oligonucleotides used in this study.
